# Supplementary material for: The Acyclic Retinoid Peretinoin Inhibits Hepatitis C Virus Replication and Infectious Virus Release in Vitro
Source: PubMed Central journal article supplement — Sci Rep. 2014 Apr 15;4:4688. doi: 10.1038/srep04688 (PMC3986704; doi:10.1038/srep04688), 2014-04-15

## Supplementary Information

Title:

The Acyclic Retinoid Peretinoin Inhibits Hepatitis C Virus Replication and Infectious Virus Release *in Vitro*

Tetsuro Shimakami<sup>1</sup>, Masao Honda<sup>1\*</sup>, Takayoshi Shirasaki<sup>1</sup>, Riuta Takabatake<sup>1</sup>, Fanwei Liu<sup>1</sup>, Kazuhisa Murai<sup>1</sup>, Takayuki Shiimoto<sup>1</sup>, Masaya Funaki<sup>1</sup>, Daisuke Yamane<sup>2</sup>, Seishi Murakami<sup>1</sup>, Stanley M. Lemon<sup>2</sup>, and Shuichi Kaneko<sup>1\*</sup>

<sup>1</sup>Department of Gastroenterology, Kanazawa University Hospital, Kanazawa, Ishikawa 920-8641, Japan

<sup>2</sup>Lineberger Comprehensive Cancer Center and the Division of Infectious Diseases, Department of Medicine, The University of North Carolina at Chapel Hill, Chapel Hill, NC 27599-7292, USA

### **\*Corresponding author**

Masao Honda, MD, PhD

Shuichi Kaneko, MD, PhD

Department of Gastroenterology, Kanazawa University Hospital

13-1 Takaramachi, Kanazawa, Ishikawa 920-8641, Japan

Tel: 81-76-265-2233; Fax: 81-76-234-4250

Masao Honda, email: mhonda@m-kanazawa.jp

Shuichi Kaneko, e-mail: [skaneko@m-kanazawa.jp](mailto:skaneko@m-kanazawa.jp)

## Figure Legends for Supplementary Figures

### Figure S1. Structures of Peretinoin, ATRA, 9-cis RA, and 13-cis RA

**Figure S2. Full-length blots/gels for Figure 2B.** In addition to Peretinoin, IFN $\alpha$ 2b was added to cells replicating HJ3-5 virus with the indicated concentrations. At 72 h after IFN $\alpha$ 2b treatment, the cell lysates were collected and subjected to western blot analysis using anti-core protein and anti- $\beta$ -actin antibodies.

**Figure S3. Effect of Peretinoin on protein expression directed by HCV IRES.** (A) Schematic representation of HCV 5'-UTR-GLuc-HCV 3'-UTR RNA and cap-CLuc-polyA RNA (depicted left and right, respectively). (B) Both RNAs were transfected into Huh-7.5 cells that had been treated with the indicated concentrations of Peretinoin at 24 h prior to transfection. After transfection, the same concentrations of Peretinoin were added immediately, and the medium was collected and replaced every 3 h until 12 h. GLuc and CLuc activity was determined; GLuc activity was normalised to CLuc activity, and then the ratio was further normalised to that of DMSO-treated cells, which was set to 100%. Data represent the mean ratio  $\pm$  SD from 2 independent experiments at each time point.

**Figure S4. Effect of Peretinoin on cellular IFN signalling.** Huh-7.5 cells (A) and HCV (H77S.3/GLuc2A)-replicating Huh-7.5 cells (B) were treated with 10–40  $\mu$ M Peretinoin, accompanied with or without IFN $\alpha$ -2b (10 IU/mL). At 3 h later, the cell lysates were collected and subjected to western blot analysis with anti-pSTAT1, anti-STAT1, and anti- $\beta$ -actin antibodies.

**Figure S5. Reduction of LD signal by Peretinoin.** Huh-7.5 cells were infected with HJ3-5 virus at an MOI of 1, and 72 h later, 250  $\mu$ M OA and 0.5 % DMSO or 250  $\mu$ M OA and 40  $\mu$ M Peretinoin were added. (A) At 72 h later, the cells were fixed and stained for nuclei, LDs, and HCV core protein, and each image was taken under exactly the same condition (nuclei, blue; LDs, green; HCV core protein, red) and then merged. (B) The signal intensity of nuclei, HCV core protein, and LDs from 5 cells, which were stained for HCV core protein and LDs, was quantitated as described in the Methods. Data shown represent mean signal intensity  $\pm$  SD from 5 cells, and the difference was analysed statistically using Student's t-test. N.S., not significant.

**Figure S6. Full-length blots/gels for Figure 3D.**

**Figure S7. Full-length blots/gels for Figure 4C.**

**Figure S8. Correlation between infectious virus titre and GLuc activity.** Huh-7.5 cells were seeded in 48-well plates at a density of  $4.0 \times 10^4$  cells/well. At 24 h later, the cells were infected with serial dilutions of the HJ3-5/GLuc2A virus. The medium was replaced with fresh medium every 24 h until 72 h. At 72 h later, GLuc activity was determined, and at the same time, the infected cells were fixed and stained for the FFU assay. The correlation between GLuc activity and FFUs/mL was examined.  $R^2$ , coefficient of determination.

**Figure S9. Intra- and extra-cellular infectivity assay after removing Peretinoin in extra-cellular medium.** FT3-7 cells were transfected with HJ3-5/GLuc2A RNA, and 7 days later, 0.5% DMSO, or 20–40  $\mu$ M Peretinoin, were added. At 72 h later, extra- and intra-cellular viruses were collected and used to infect naïve Huh-7.5 cells. Replication capacity was also determined by measuring secreted GLuc activity. To prepare intra-cellular infectious virus, cell pellets of HJ3-5/GLuc2A-replicating FT3-7 cells harvested after trypsinization were resuspended in complete medium, washed twice with PBS, and lysed by 4 cycles of freezing and thawing. The lysates were clarified by centrifugation at  $2,300 \times g$  for 5 min prior to inoculation onto naïve Huh-7.5 cells. To remove Peretinoin in the medium derived from extra-cellular cultures, we centrifuged the medium containing Peretinoin in an SW41 rotor (Beckman Coulter Inc., Brea, CA) at  $209,678 \times g$  for 1.5 h at 4 °C, and then the precipitated virus was re-suspended to fresh medium, with which we infected naïve Huh-7.5 cells. After 6 h inoculation of extra- and intra-cellular virus, medium containing virus was removed by extensive wash, and medium was replaced with fresh one every 24 h until 48 h. At 48 h after infection, we determined GLuc activity and used it as an indicator of the infectious virus titre. Intra- and extra-cellular infectivity was normalised to replication capacity at infection, and these were then normalised to those of DMSO-treated cells, which were set to 100%. The ratio of extracellular infectious virus to intracellular virus was calculated at the indicated conditions, and it was then normalised to DMSO-treated cells, which were set to 100%. Data show the mean ratio to that of DMSO-treated cells  $\pm$  SD from 3 independent experiments.

**Figure S10. Effect of Peretinoin on the entry of HCV into cells.** (A) Huh 7.5 cells were treated with the indicated concentrations of Peretinoin for 72 h, and then they were infected with HJ3-5 virus at MOI of 1. The infected cells were incubated 2 h at 4 and 37 °C, and medium containing virus was extensively washed and removed. At 3h later, total cellular RNA was extracted, and the amount of HCV RNA and 18S rRNA was quantitated by RTD-PCR. Relative HCV RNA abundance normalised to the amount of 18S rRNA is presented as fold change  $\pm$  SD

compared to DMSO-treated cells at 37 °C from 3 independent experiments. **(B)** Huh-7.5 cells were treated with the indicated concentrations of Peretinoin for 48 h, and then, they were infected with serial dilutions of HJ3-5 virus. The infected cells were maintained without Peretinoin, and the infectious virus titer was determined at 72 h later. Data show the mean FFUs/mL  $\pm$  SD from at least 3 independent experiments.

**Figure S11. Selection of Peretinoin-resistant HCV mutants or cells.** Huh-7.5 cells were transfected with H77S.3/GLuc2A RNA. At 48 h later, Peretinoin was added at the indicated concentrations. The medium was collected and replaced with fresh medium every 24 h for 13–15 days. When the cells became confluent, they were passaged at a 1:3 ratio, and GLuc activity was determined every day. Two sets of experiments were performed independently, depicted as Sets 1 and 2. Data show the mean GLuc activity  $\pm$  SD from 3 different plates.

## **Supplementary Methods**

### ***RNA transcription***

To synthesise cap-CLuc-polyA RNA, pCMVCLuc (New England Biolabs, Inc., Tokyo, Japan) was amplified by PCR using 2 primers (5'-TAA TAC GAC TCA CTA TAG GGC CAC CAT GAA GAC CTT AAT TCT TGC CGT T-3' and 5'-AGA CAC ACA AAA AAC CTA CAC ACA GAT GTA ATG-3'), and the resulting PCR product was used as a template for the following RNA transcription. Capped RNA was synthesised using a MEGAscript T7 Kit (Life Technologies, Carlsbad, CA) by following a modified protocol for capped RNA transcription. Synthesised RNA was purified using an RNeasy Mini Kit.

### ***Antibodies for western blot analysis***

The expression of phosphorylated STAT1 (pSTAT1) and STAT1 was evaluated by using rabbit anti-pSTAT1 and rabbit anti-STAT1 antibodies, respectively.

### ***Secreted luciferase activity***

The activity of secreted CLuc was determined using a BioLux *Cypridina* Luciferase Assay Kit.

Figure S1

Peretinoin

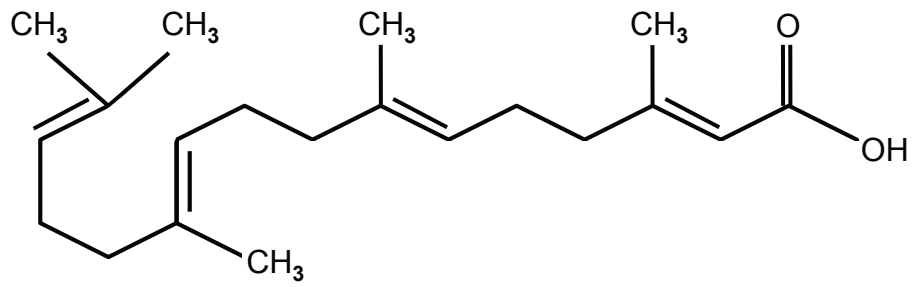

ATRA

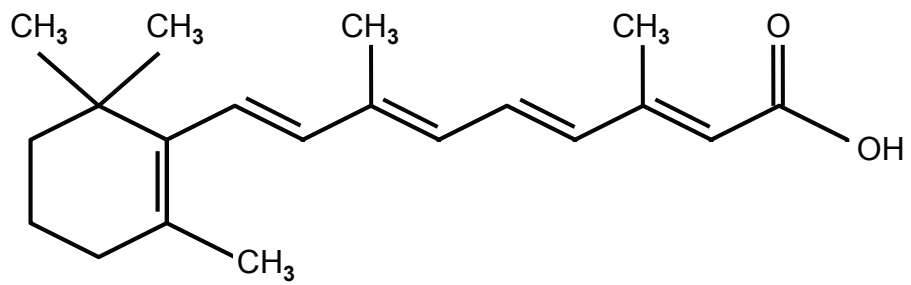

9-cis RA

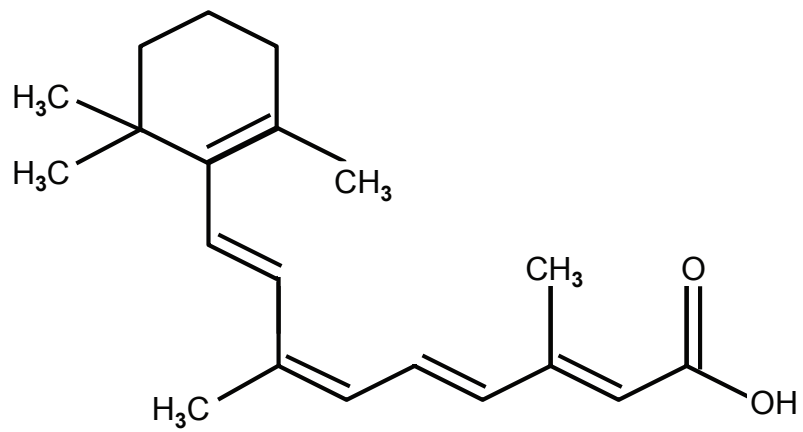

13-cis RA

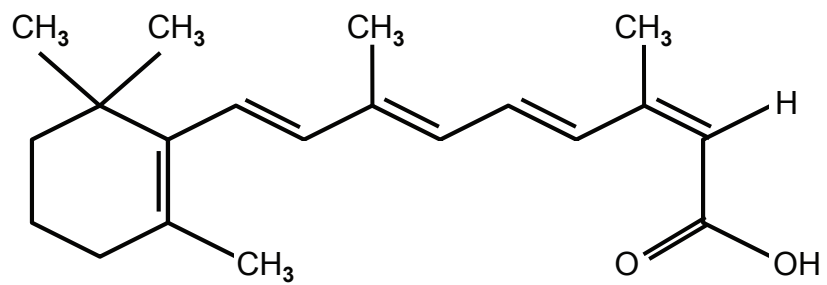

Figure S2

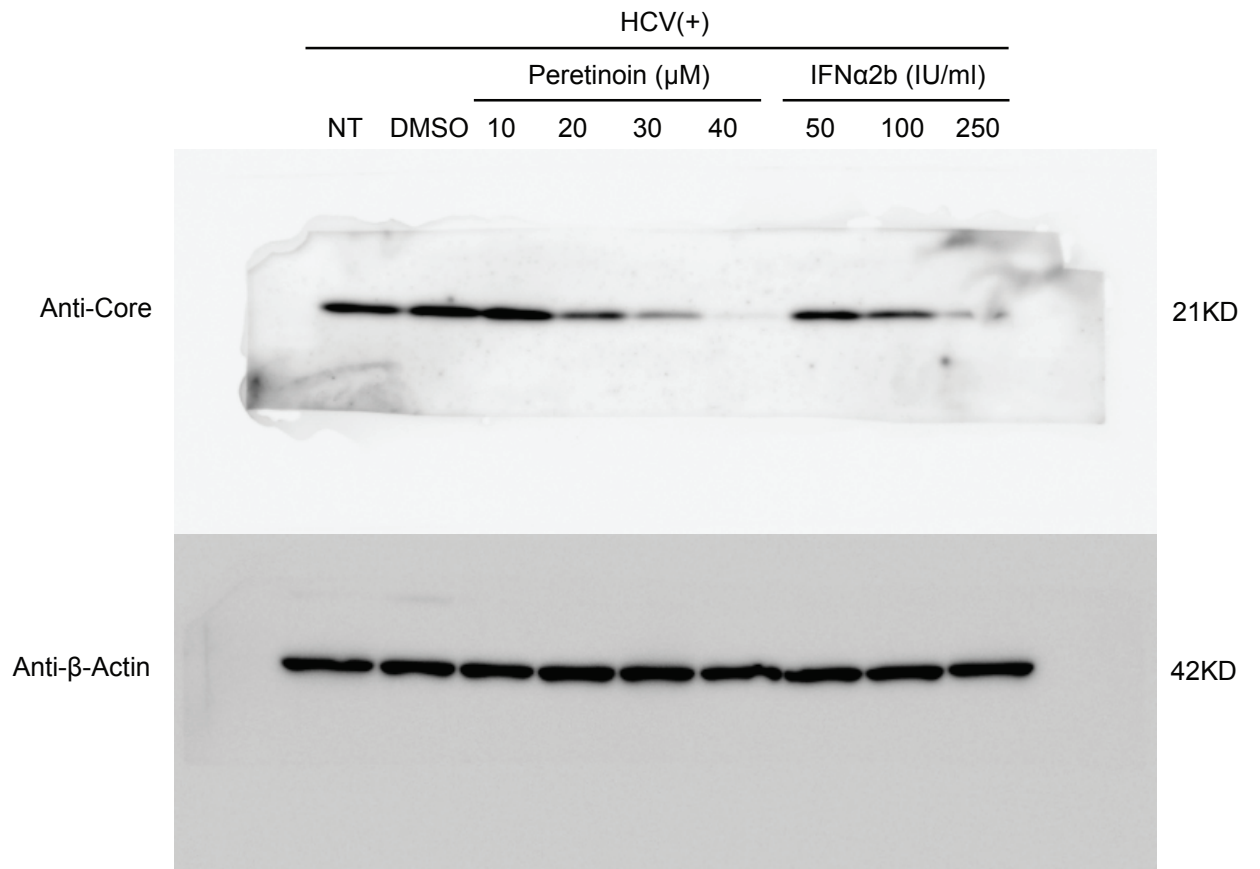

Figure S3

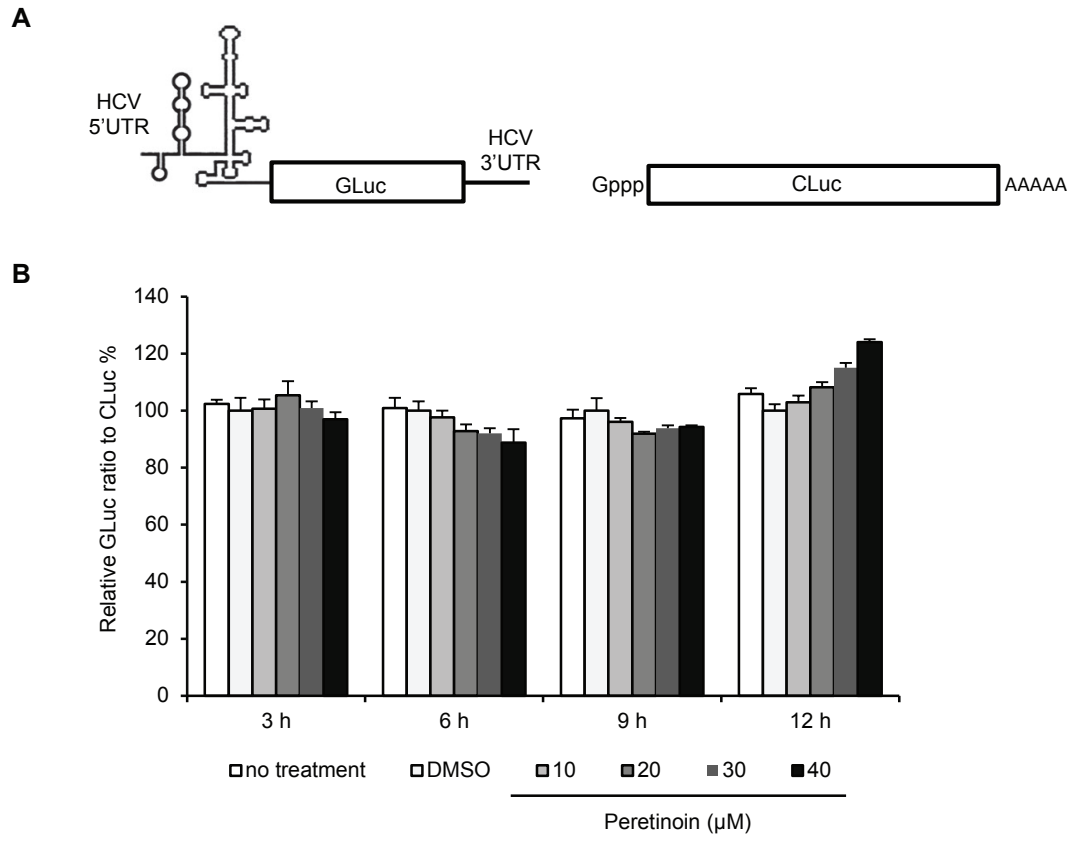

Figure S4

**A**

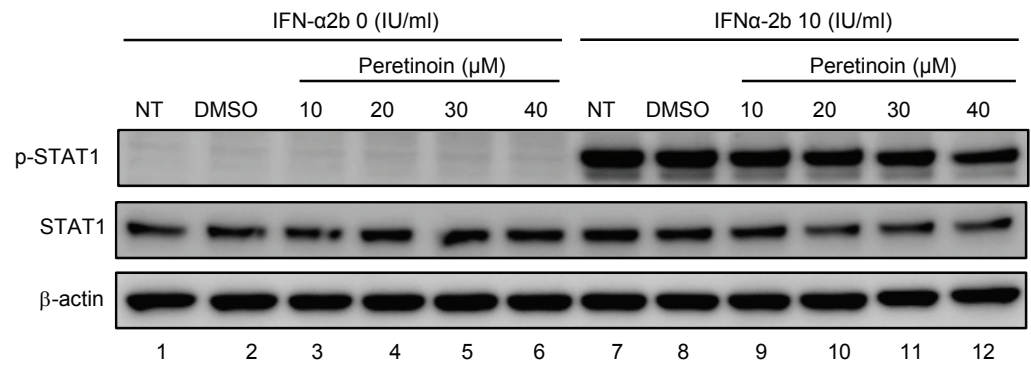

**B**

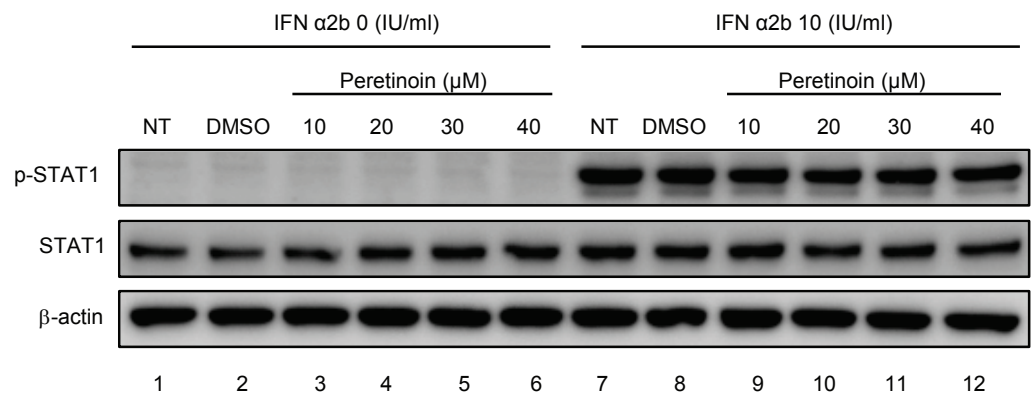



Figure S5

**A**

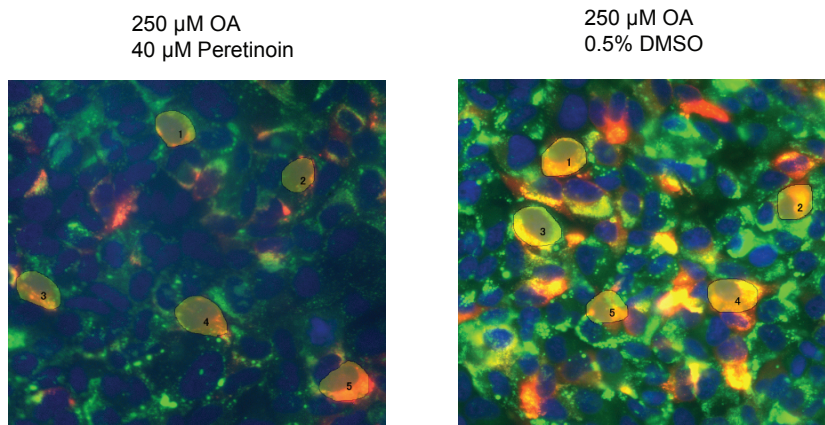

**B**

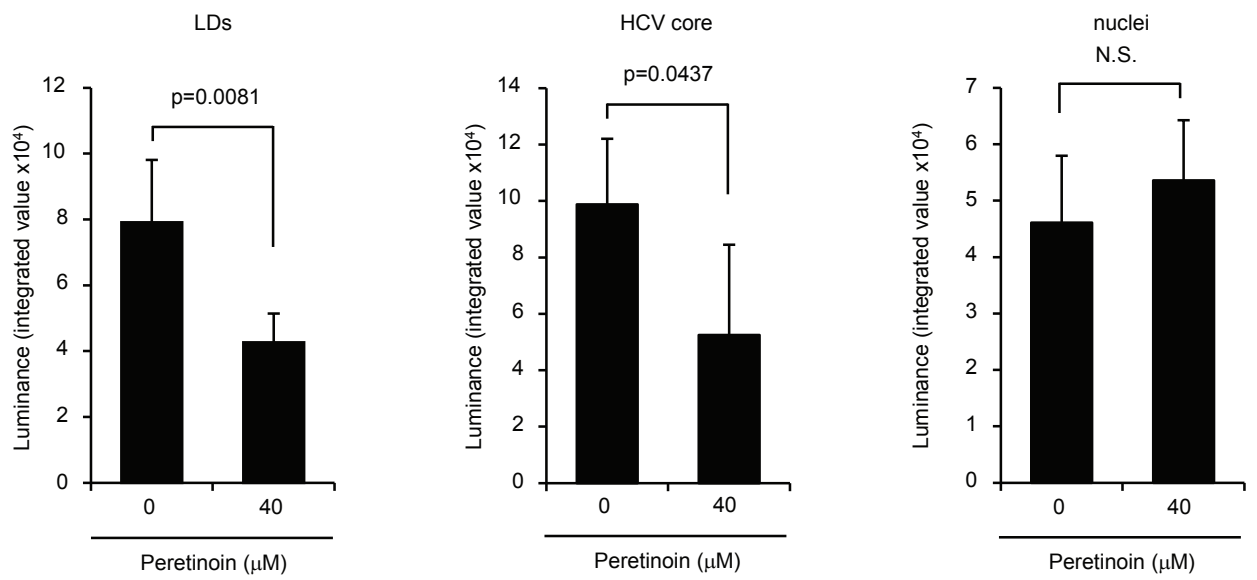

Figure S6

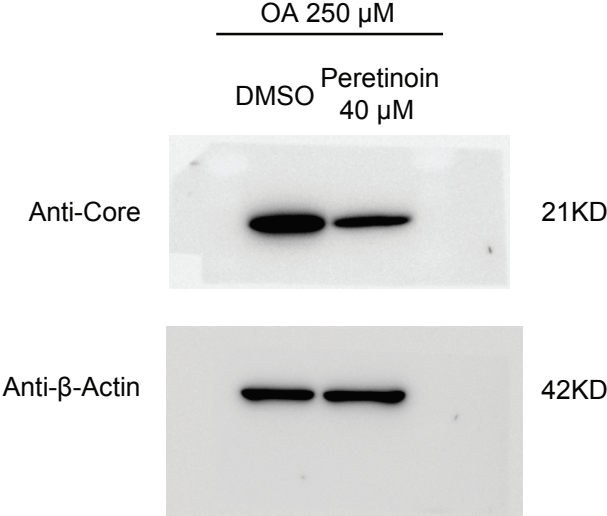

Figure S7

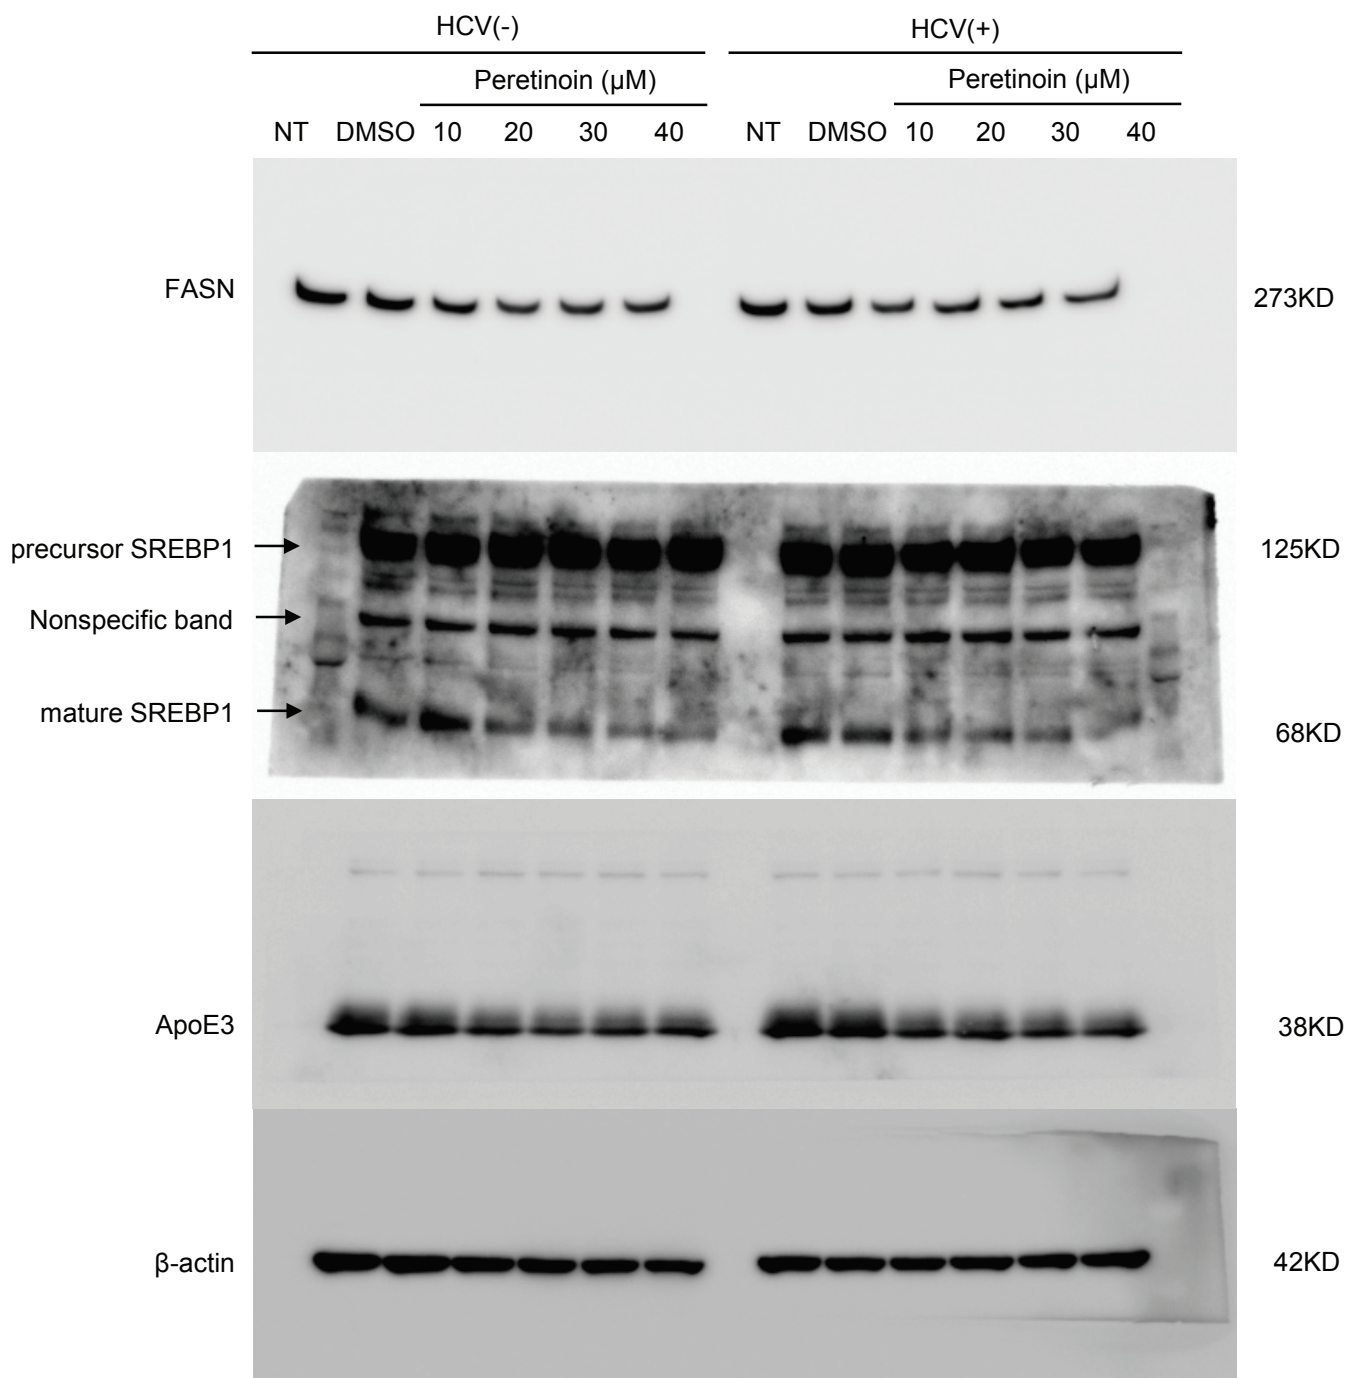

Figure S8

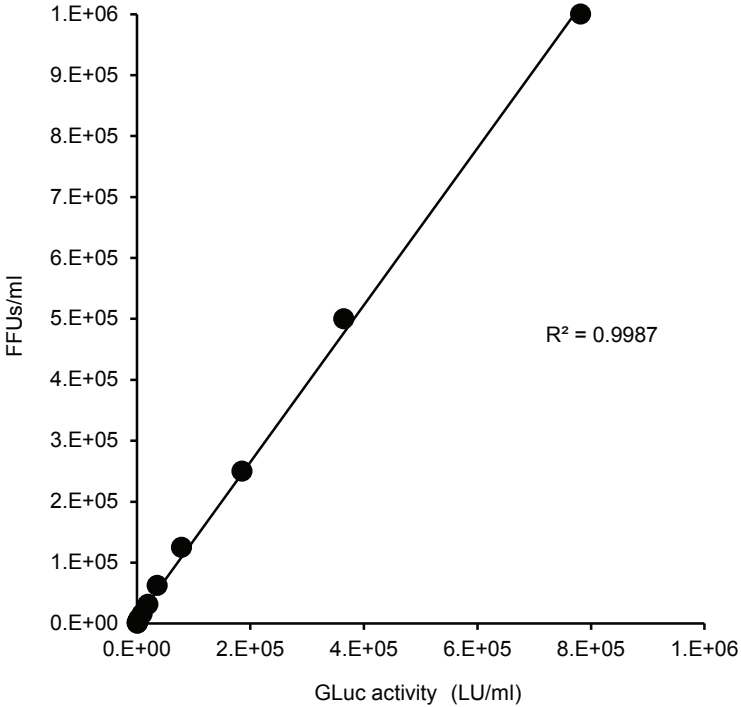

Figure S9

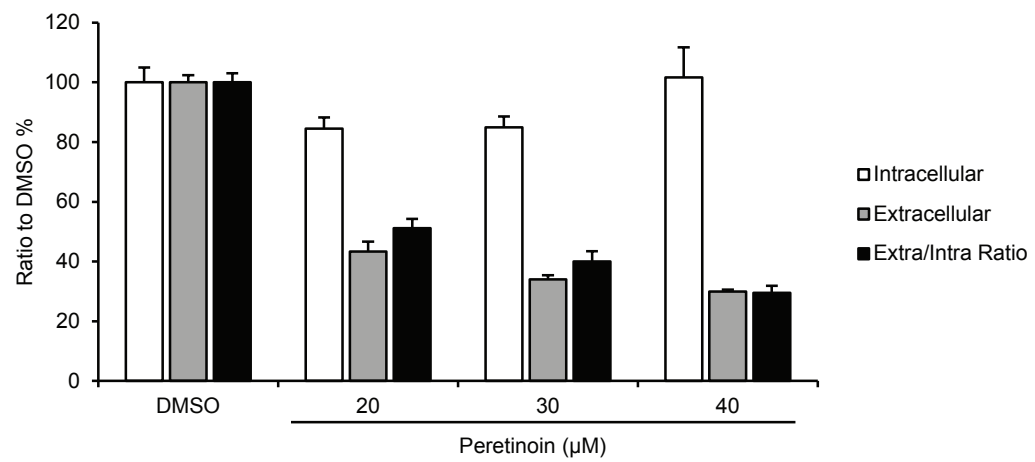

Figure S10

**A**

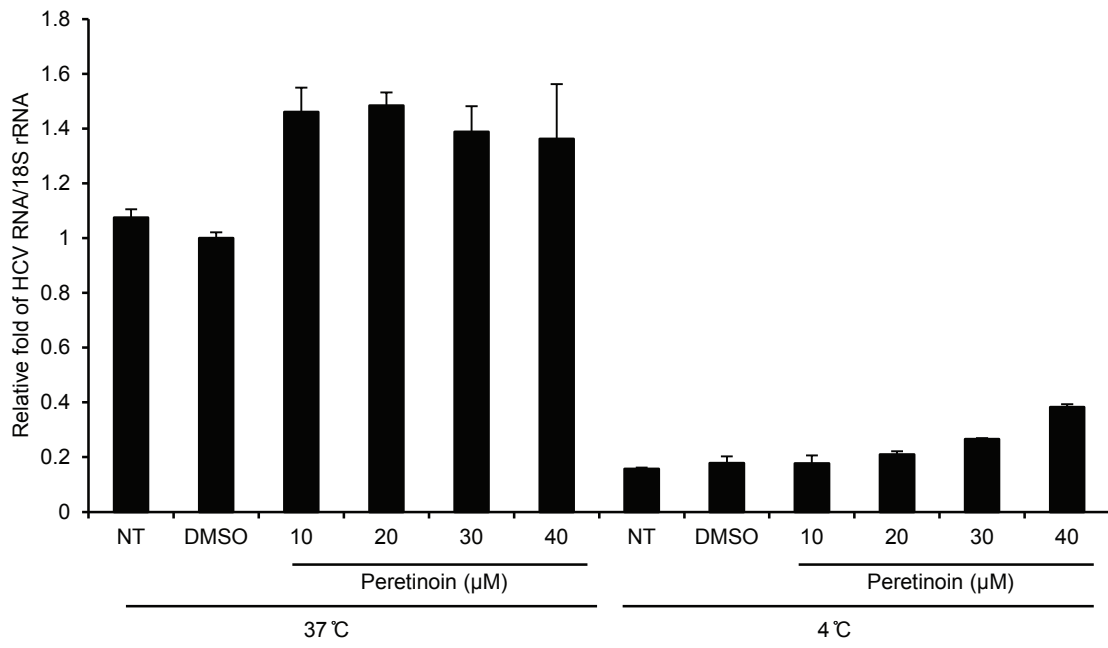

**B**

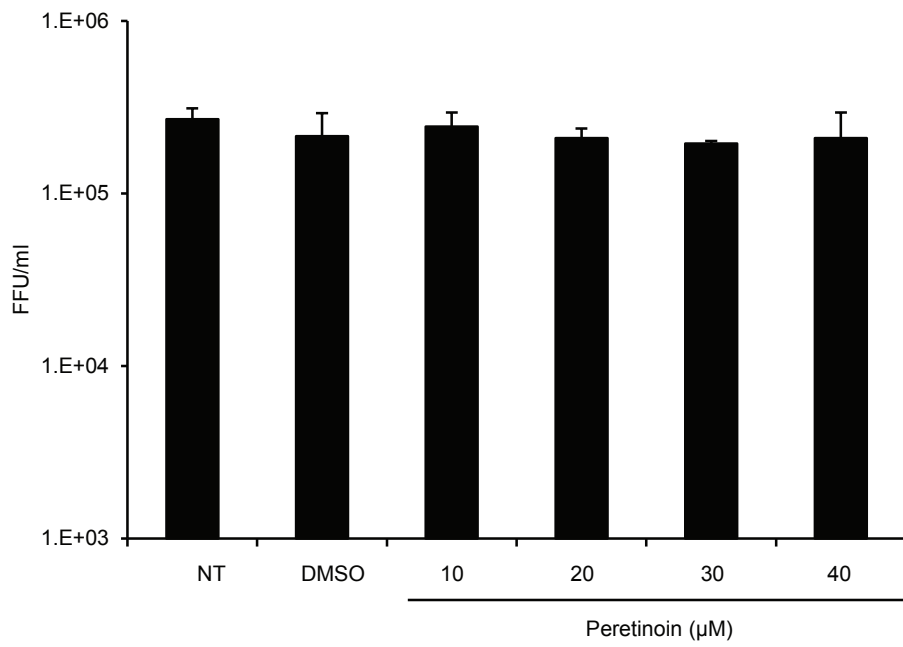

Figure S11

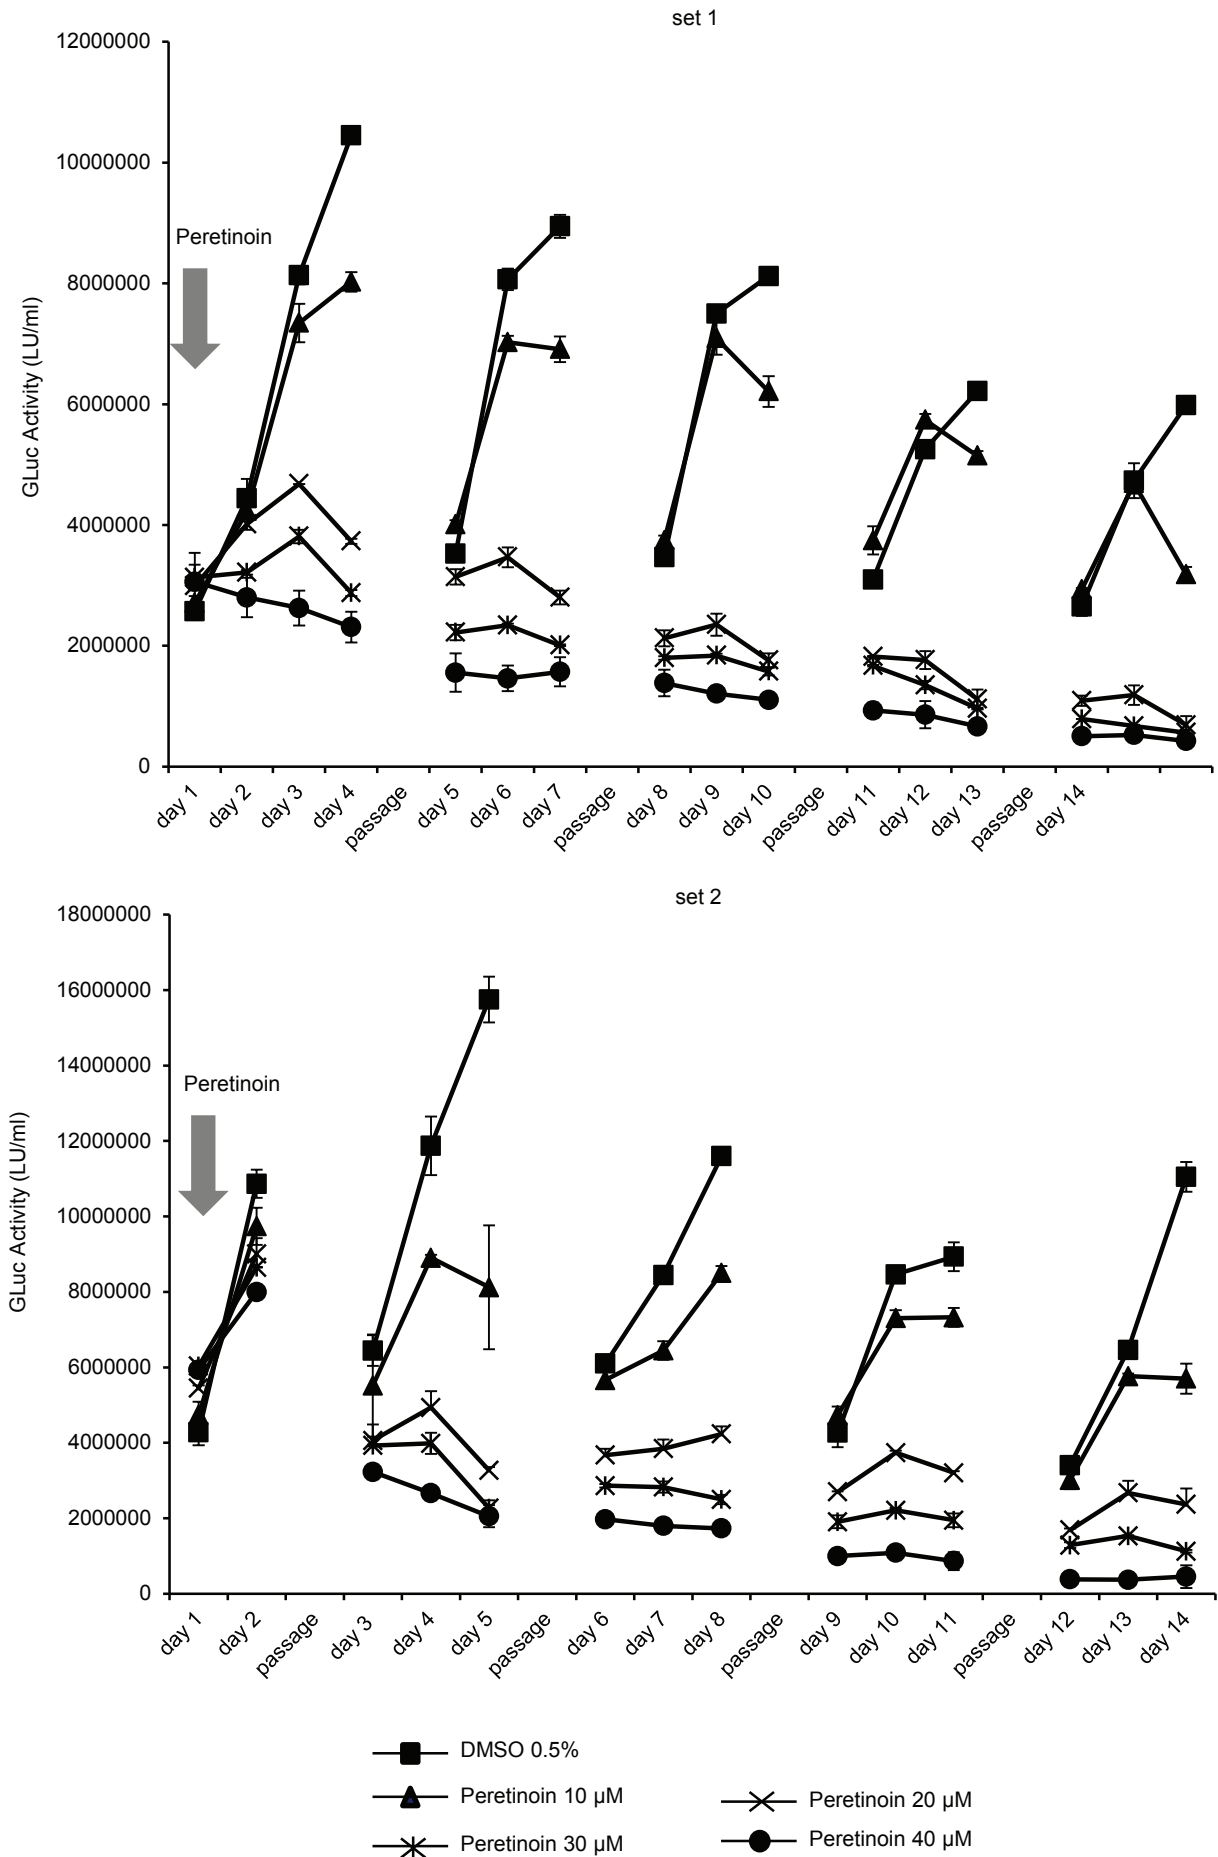

Supplement: srep04688-s1.pdf [file srep04688-s1.pdf]
